# Supplementary material for: Potentiometric extractive sensing of lead ions over a nickel oxide intercalated chitosan-grafted-polyaniline composite
Source: Royal Society of Chemistry journal article supplement (doi:10.1039/d0dt02687e), 2020-01-01
Supplement: d0dt02687e1.pdf [file d0dt02687e1.pdf]

### Supporting information

#### Potentiometric extractive sensing of lead ion over nickel oxide intercalated chitosan-grafted-polyaniline composite

Chandra Shekhar Kushwaha and S.K. Shukla\*

Department of Polymer Science, Bhaskaracharya College of Applied Sciences, University of Delhi, Delhi-110075, India

\*Corresponding author:

Tel. 091-11-25087595; Fax: 091-11-25081015; E-mail: sarojshukla2003@yahoo.co.in

**Figure S1.** Potential variation against (a) pH-values, and (b) temperature at  $1.0 \times 10^{-4}$  M  $Pb^{2+}$  concentration.

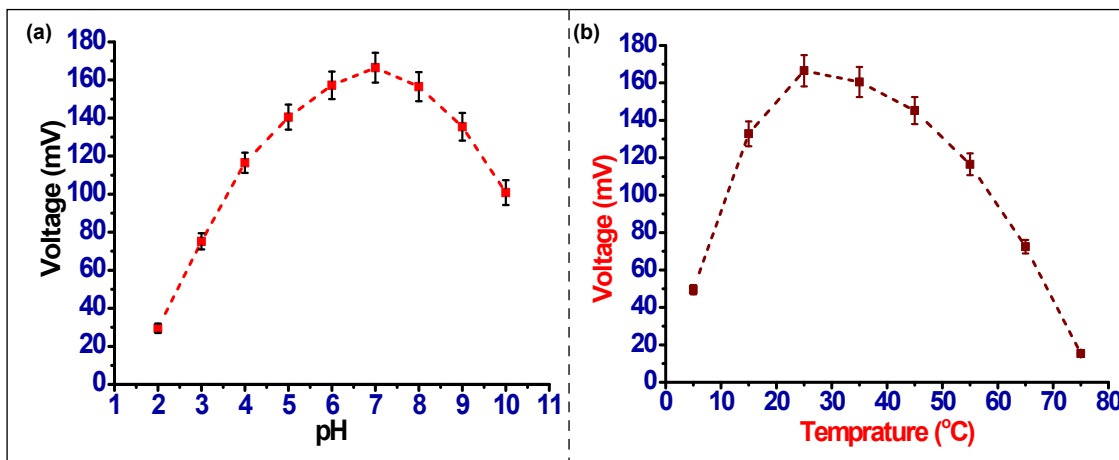

**Table S1:** Sensing parameters of PANI, CHIT, CHIT-g-PANI, and NiO-in-CHIT-g-PANI.

| Sample             | Measured range                                 | Initial voltage | Final voltage | Sensitivity ( $mV \cdot \mu M^{-1} \cdot cm^{-2}$ ) |
|--------------------|------------------------------------------------|-----------------|---------------|-----------------------------------------------------|
| PANI               | $1.0 \times 10^{-6}$ to $1.0 \times 10^{-3}$ M | 0.2 mV          | 19.5 mV       | 0.0096                                              |
| CHIT               | $1.0 \times 10^{-6}$ to $1.0 \times 10^{-3}$ M | nil             | nil           | nil                                                 |
| CHIT-g-PANI        | $1.0 \times 10^{-6}$ to $1.0 \times 10^{-3}$ M | 0.5 mV          | 55.0 mV       | 0.0545                                              |
| NiO-in-CHIT-g-PANI | $1.0 \times 10^{-6}$ to $1.0 \times 10^{-3}$ M | 0.3 mV          | 250.5 mV      | 0.2379                                              |

**Table S2:** Recovery study of electrode NiO-in-CHIT-g-PANI

| S. No. | Sample                                              | Concentration |                |              |
|--------|-----------------------------------------------------|---------------|----------------|--------------|
|        |                                                     | Adsorbed      | Recovery       | Recovery (%) |
| 1      | Standard Pb(NO <sub>3</sub> ) <sub>2</sub> solution | 30.5 µg       | 25.78 ± 0.05µg | 84.5 %       |
| 2      | Yamuna river                                        | 31.50 µg      | 26.70 ± 0.03µg | 84.8 %       |
| 3      | Sewage water                                        | 30.80 µg      | 25.95 ± 0.05µg | 84.3 %       |
